# Supplementary material for: Ligand-mediated and tertiary interactions cooperatively stabilize the P1 region in the guanine-sensing riboswitch
Source: PLOS journal article supplement (doi:10.1371/journal.pone.0179271), 2017-06-22
Supplement: S17 (10.1371/journal.pone.0179271.s017) [file journal.pone.0179271.s017]

**S2 Table: Core nucleotides taken into account for analysis<sup>[a]</sup>**

| Assignment                        | Nucleotide numbers         |
|-----------------------------------|----------------------------|
| 80% least fluctuating nucleotides | 19-35, 37-47, 50-61, 65-78 |

<sup>[a]</sup> Determined from the MD simulations of Gsw<sup>apt</sup> in the absence of Mg<sup>2+</sup> ions as the 80% least fluctuating nucleotides. The core nucleotides were used for fitting the structures prior to the calculation of the RMSD (Table 1) and the RMSF (Fig. 2, S8 Fig), and for calculating the average RMSF in S4 Table.
